# Supplementary material for: Excision of translesion synthesis errors orchestrates responses to helix-distorting DNA lesions
Source: PubMed Central journal article supplement — J Cell Biol. 2015 Apr 13;209(1):33–46. doi: 10.1083/jcb.201408017 (PMC4395481; doi:10.1083/jcb.201408017), 2015-04-13
Supplement: supp_jcb.201408017_JCB_201408017_sm.pdf [file supp_jcb.201408017_JCB_201408017_sm.pdf]

Tsaalbi-Shtylik et al., <http://www.jem.org/cgi/content/full/jem.201408017/DC1>

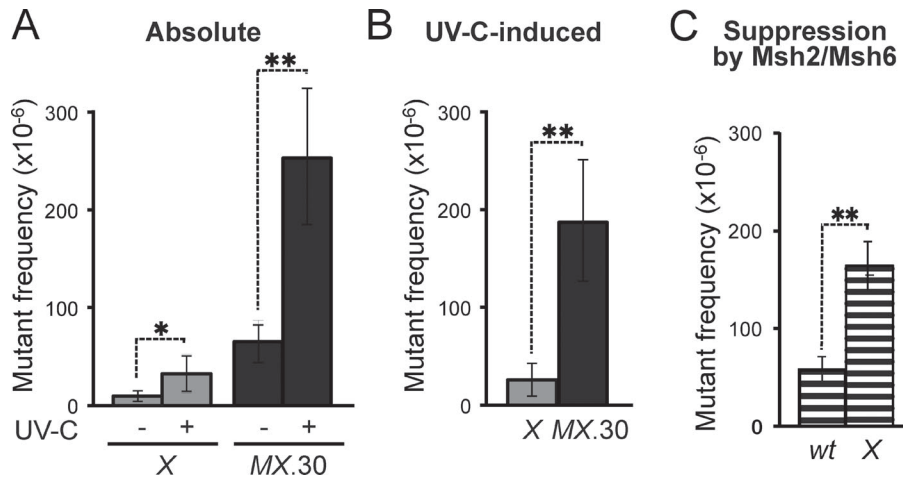

Figure S1. **Msh2/Msh6-dependent suppression of the mutagenicity of UV-C.** (A) Mutant frequencies in isogenic ES cell lines after mock treatment or after low-dose UV-C (0.75 J/m<sup>2</sup>). The Msh6<sup>-/-</sup>Xpa<sup>-/-</sup> line used here was line 30. Bars represent averages of three independent experiments. See Fig. 1 for results using an independently derived Msh6<sup>-/-</sup>Xpa<sup>-/-</sup> clone (line 4). (B) UV-C-induced mutagenesis in Msh6<sup>-/-</sup> and in Msh6<sup>-/-</sup>Xpa<sup>-/-</sup> line 30 cells. (C) Msh2/Msh6-dependent suppression of induced mutagenesis in NER-proficient cells (WT; derived from Fig. 2 C) and in NER-deficient cells (X; Xpa<sup>-/-</sup> and Msh6<sup>-/-</sup>Xpa<sup>-/-</sup> line 30).

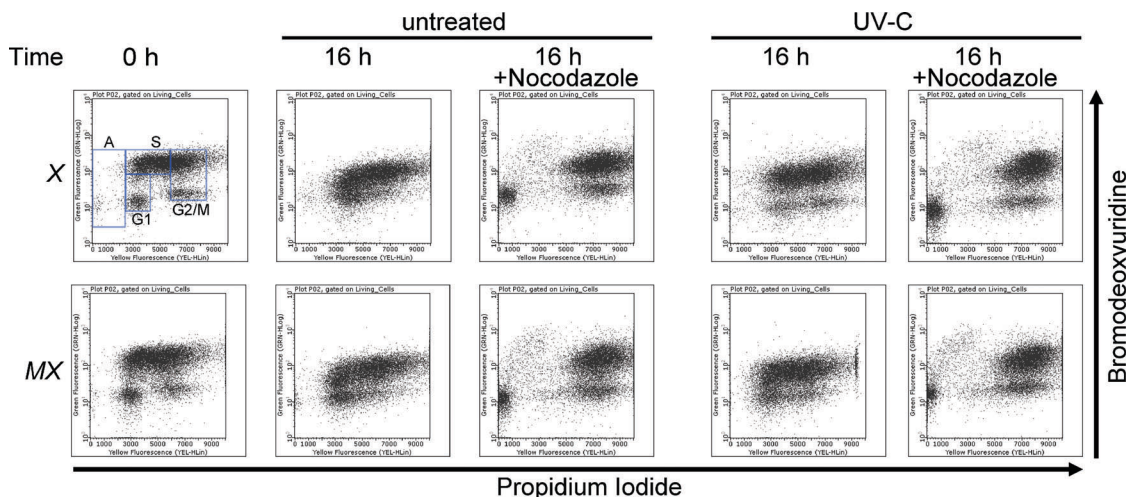

Figure S2. **Accumulation of UV-C exposed ES cell lines at mitosis after nocodazole-treatment.** ES cells were treated with 0.75 J/m<sup>2</sup> UV-C or mock treated and replicating cells were pulse-labeled with BrdU, followed by the addition of Nocodazole. At 16 h after UV-C treatment, cells were fixed and stained for DNA content (using Propidium iodide) and for BrdU and analyzed by bivariate FACS. A, sub-G1 fraction, G1, G1 phase, S, S phase, G2, and G2/M phases. 10,000 cells were analyzed per data point.

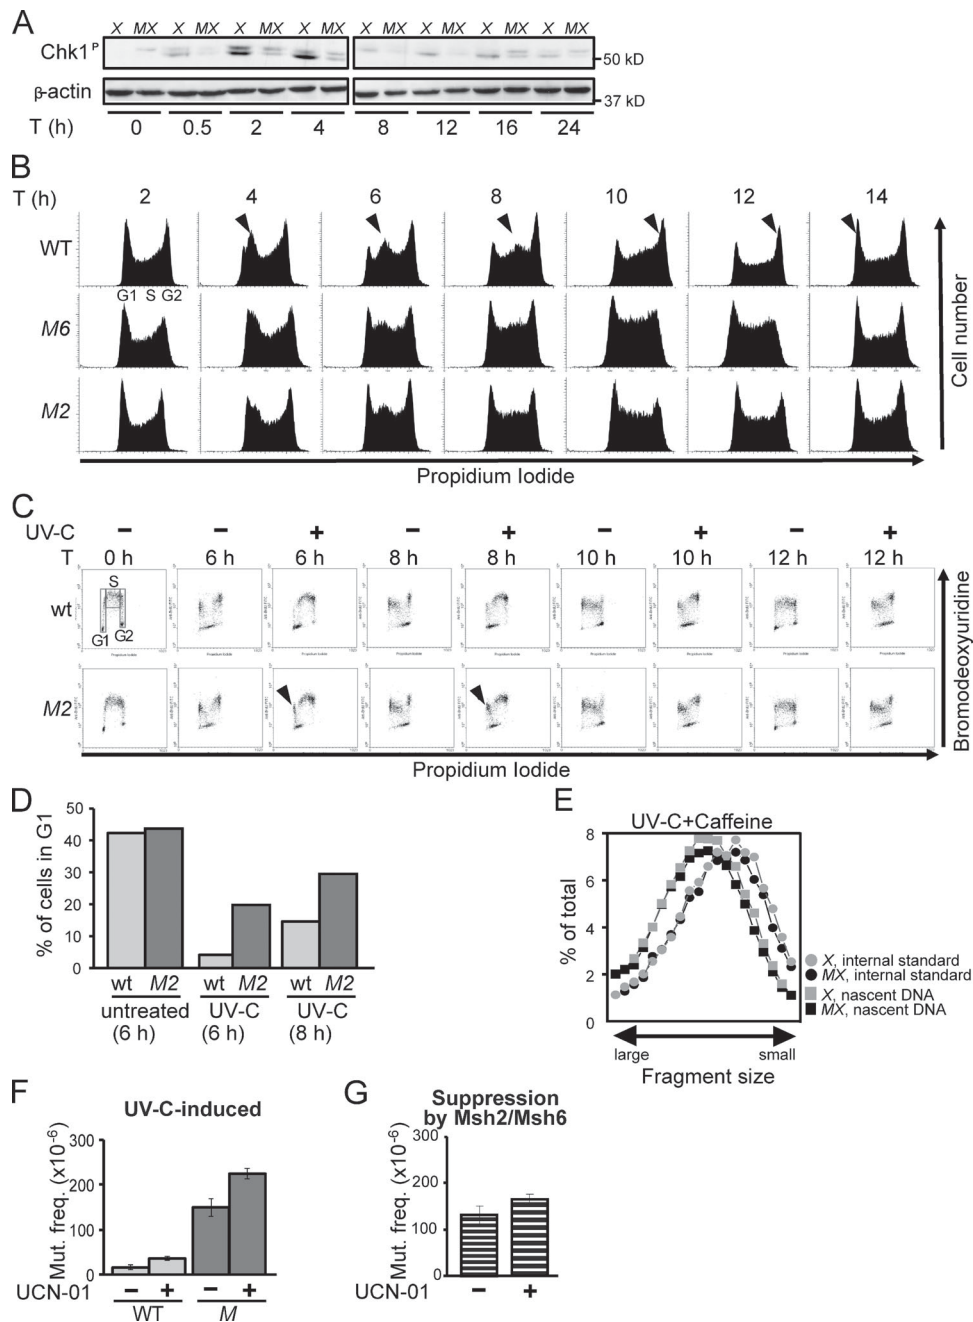

Figure S3. **Msh2/Msh6-dependent DNA damage signaling and induction of cell cycle checkpoints.** (A) Kinetics of phosphorylation of Chk1 in response to UV-C light (0.75 J/m<sup>2</sup>). b-actin, loading control. X, Xpa<sup>-/-</sup>, MX, Msh6<sup>-/-</sup>Xpa<sup>-/-</sup> line 4. Shown is a representative experiment of three independent experiments. See Fig. 4 A for one independent experiment. (B) Cell cycle responses of WT, Msh6<sup>-/-</sup> (M6), and Msh2<sup>-/-</sup> (M2) ES cell lines to UV-C exposure (2 J/m<sup>2</sup>). After exposure, cells were fixed at the indicated times and analyzed for DNA content (propidium iodide staining) by flow cytometry. Arrowheads indicate delayed progression of damaged WT cells, compared with the Msh2- or Msh6-deficient cells. 10,000 cells were analyzed per data point. Shown is a representative experiment of three independent experiments. (C) Bivariate cell cycle profiles after UV-C exposure (2 J/m<sup>2</sup>) of WT and Msh2<sup>-/-</sup> (M2) ES cells. Replicating cells were pulse-labeled with BrdU immediately after exposure. Cells were fixed at the indicated times and analyzed for DNA and BrdU content (propidium iodide staining and immunostaining, respectively) by flow cytometry. Arrowheads indicate the increased reappearance of BrdU-positive Msh2<sup>-/-</sup> ES cells at G1, compared with WT controls. 10,000 cells were analyzed per data point. Shown is a representative experiment of three independent experiments. (D) Quantification of WT and Msh2<sup>-/-</sup> (M2) cells at G1, at 6 and 8 h after treatment with 2 J/m<sup>2</sup> UV, derived from C. (E) Maturation of nascent strands, 4 h after UV-C treatment (0.75 J/m<sup>2</sup>) of ES cells, cultured in the presence of the Atr inhibitor caffeine (5 mM). Circles, internal standards ([14C] label, representing intra-CPD fragments). Squares, nascent strands ([3H] label). (F) Frequencies of UV-C (2 J/m<sup>2</sup>)-induced Hprt mutants in WT and Msh6<sup>-/-</sup> (M) ES cells, cultured in the absence and in the presence of UCN-01 (300 nM). Bars represent averages of three independent experiments. (G) Suppression of induced mutations by post-TLS repair, cultured in the absence and in the presence of UCN201 after UV-C exposure, were derived from Fig. S3F.

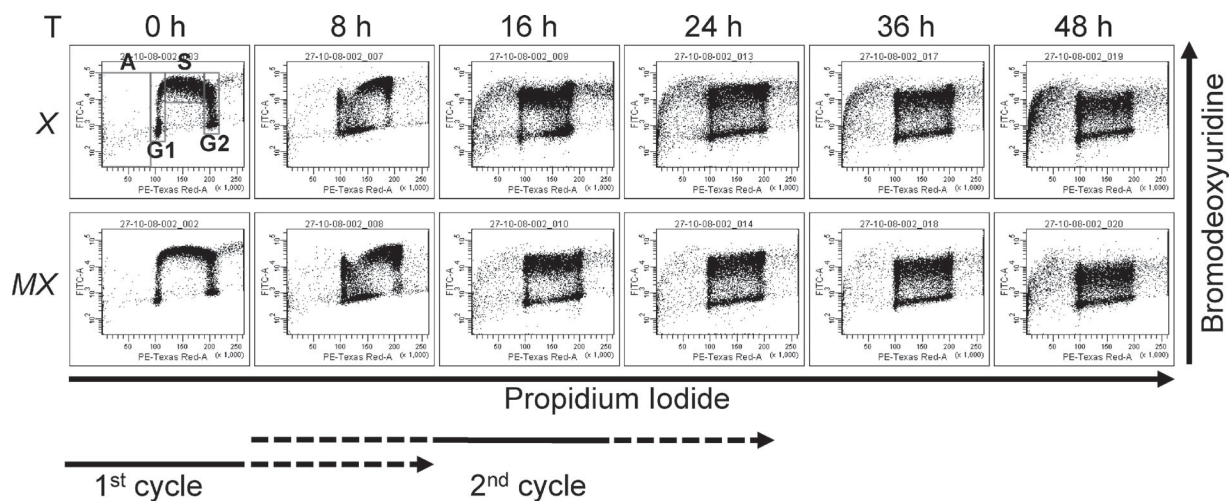

Figure S4. **Msh2/Msh6-dependent induction of delayed apoptosis in response to low-dose UV-C.** Bivariate flow cytometry of  $Xpa^{-/-}$  (X) and  $Msh62/2Xpa^{-/-}$  (MX) ES cells after exposure to  $0.75 \text{ J/m}^2$  UV-C. Immediately after treatment, replicating cells were pulse labeled with BrdU. Cells were analyzed for DNA content (propidium iodide staining) and for levels of incorporated BrdU. A, sub-G1 fraction; G1, G1 phase; S, S phase; G2/M phase. 10,000 cells were analyzed per data point.

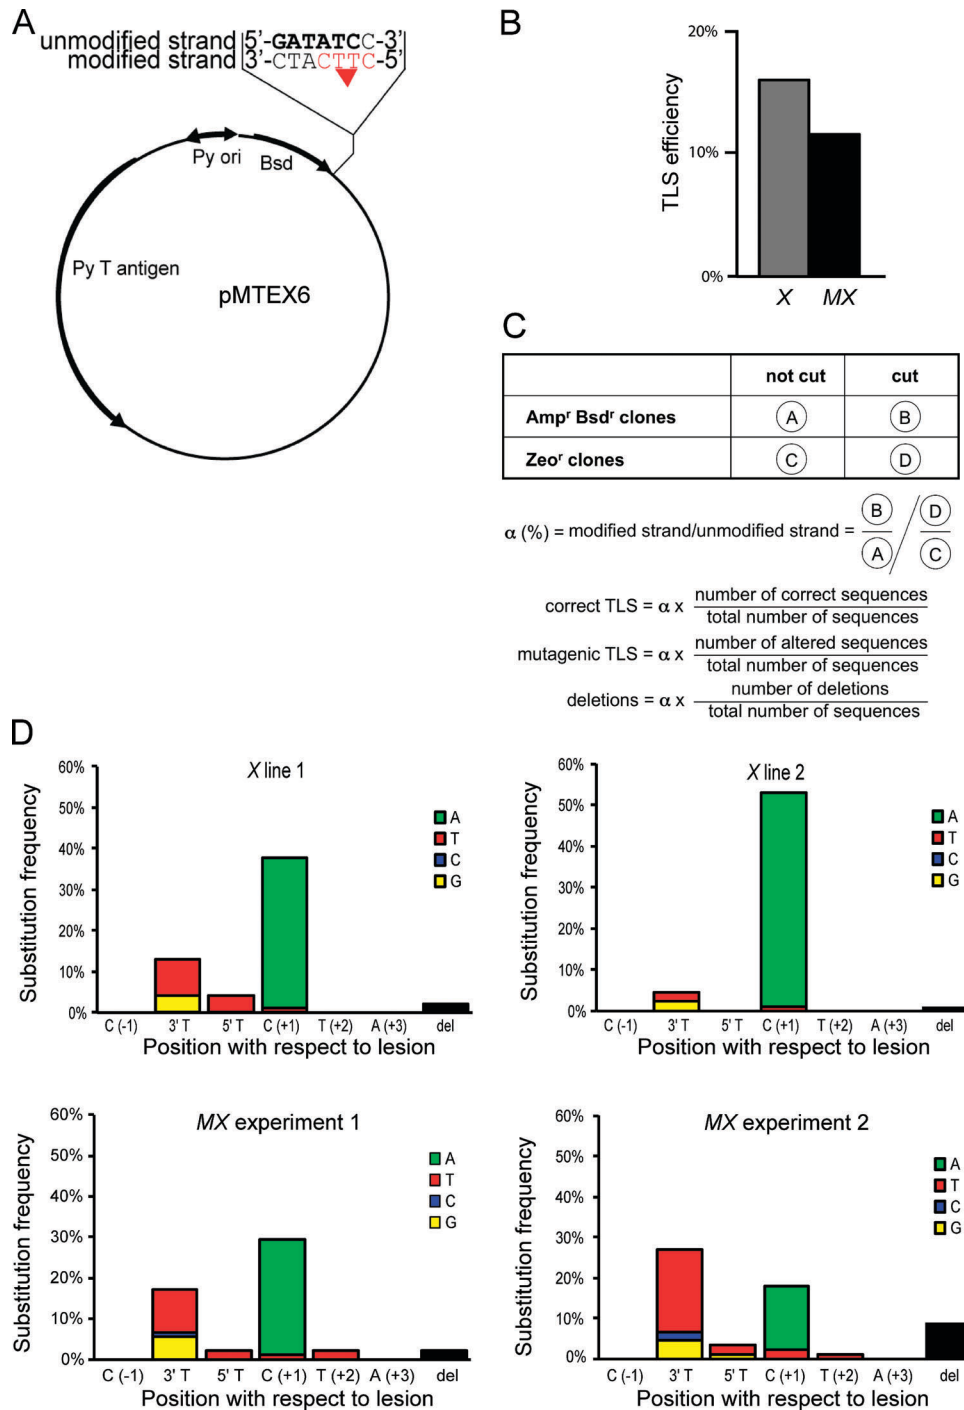

Figure S5. **Normal frequency but increased mutagenicity of TLS at a defined (624)TT in Msh2/Msh6-deficient cells.** X, Xpc<sup>-/-</sup>, MX, Msh6<sup>-/-</sup>Xpc<sup>-/-</sup>. (A) Replicating plasmid pMTEX6 carrying a site-specific (624)TT photolesion (red triangle). Bold, disrupted EcoRV site. Red sequence, mismatched tetramer, enabling to distinguish both strands after replication. Py ori, mouse Polyoma virus replication origin. Py T antigen, mouse Polyoma virus large T antigen, required for replication origin function. Bsd, Blasticidin resistance cassette. (B) Relative efficiency of TLS at a site-specific (6-4)TT photolesion in MEF lines. X, MEFs deficient for the core NER gene Xpc, MX, MEFs deficient for Xpc and Msh2. Two Xpc<sup>-/-</sup> lines (top) and one Msh6<sup>-/-</sup>Xpc<sup>-/-</sup> line (bottom) were used. (C) Calculation of frequencies of mutagenic and nonmutagenic TLS. (D) Quantification of mutations at, and adjacent to, the site-specific (624)TT photolesion in replicated plasmids rescued, from transfected MEFs. X, MEFs deficient for the key NER gene Xpc (two independent lines), MX, MEFs deficient for Xpc and Msh2 (one line, two independent experiments). The frequency of substitutions opposite the 39, T of the (6-4)TT photolesion was significantly ( $P = 0.0012$ ) increased in the Msh2-deficient cells. Del, deletions of  $\leq 4$  nucleotides. The relatively high frequency of substitutions at the +1 position in both genotypes represents an artifact of the assay as these substitutions are not observed in the genomic mutation spectra (Table S1).

Table S1. Mutation spectra at genomic *Hprt* in ES cells*Xpa*<sup>-/-</sup> ES cells (n = 127 substitutions, from in total two experiments), 0.75 J/m<sup>2</sup> UV-C

| position                            | mutation | strand <sup>1</sup> | 5' → 3' target | amino acid change | # of mutants |
|-------------------------------------|----------|---------------------|----------------|-------------------|--------------|
| Transitions at dipyrimidine sites   |          |                     |                |                   |              |
| 113                                 | GC>AT    | NTS                 | TTC(C)TCA      | Pro>Leu           | 1            |
| 145                                 | GC>AT    | NTS                 | AGA(C)TTG      | Leu>Phe           | 1            |
| 146                                 | AT>GC    | NTS                 | GAC(T)TGC      | Leu>Pro           | 1            |
| 151                                 | GC>AT    | NTS                 | GCT(C)GAG      | Arg>stop          | 1            |
| 203                                 | AT>GC    | NTS                 | TGC(T)CAA      | Leu>Pro           | 1            |
| 208                                 | GC>AT    | TS                  | AAG(G)GGG      | Gly>Arg           | 4            |
| 209                                 | GC>AT    | TS                  | AGG(G)GGG      | Gly>Glu           | 3            |
| 217                                 | AT>GC    | TS                  | TAT(A)AGT      | Lys>Glu           | 1            |
| 325                                 | GC>AT    | NTS                 | GAT(C)AGT      | Gln>stop          | 2            |
| 400                                 | GC>AT    | TS                  | GTT(G)AAG      | Glu>Lys           | 13           |
| 419                                 | GC>AT    | TS                  | CTG(G)TAA      | Gly>Asp           | 1            |
| 464                                 | GC>AT    | NTS                 | GCC(C)CAA      | Pro>Leu           | 1            |
| 508                                 | GC>AT    | NTS                 | TCT(C)GAA      | Arg>stop          | 3            |
| 527                                 | GC>AT    | NTS                 | GGC(C)AGA      | Pro>Leu           | 1            |
| 538                                 | GC>AT    | TS                  | GTT(G)GAT      | Gly>Arg           | 4            |
| 539                                 | GC>AT    | TS                  | TTG(G)ATT      | Gly>Glu           | 2            |
| 544                                 | GC>AT    | TS                  | TTT(G)AAA      | Glu>Lys           | 7            |
| 545                                 | AT>GC    | TS                  | TTG(A)AAT      | Glu>Gly           | 1            |
| 568                                 | GC>AT    | TS                  | GTT(G)GAT      | Gly>Arg           | 4            |
| 569                                 | GC>AT    | TS                  | TTG(G)ATA      | Gly>Glu           | 4            |
| 580                                 | GC>AT    | TS                  | CTT(G)ACT      | Asp>Asn           | 2            |
| 589                                 | GC>AT    | TS                  | AAT(G)AGT      | Glu>Lys           | 1            |
| 599                                 | GC>AT    | TS                  | TCA(G)GGA      | Arg>Lys           | 5            |
| 601                                 | GC>AT    | TS                  | AGG(G)ATT      | Asp>Asn           | 1            |
| 635                                 | GC>AT    | TS                  | CTG(G)AAA      | Gly>Glu           | 2            |
| Transversions at dipyrimidine sites |          |                     |                |                   |              |
| 96                                  | GC>TA    | TS                  | TTT(G)GAA      | Leu>Phe           | 1            |
| 100                                 | AT>TA    | TS                  | GAA(A)AAG      | Lys>stop          | 1            |
| 125                                 | AT>TA    | NTS                 | TGA(T)TAT      | Ile>Asn           | 1            |
| 133                                 | AT>TA    | TS                  | GAC(A)GGA      | Arg>Trp           | 1            |
| 149                                 | GC>TA    | NTS                 | TTG(C)TCG      | Ala>Asp           | 1            |
| 205                                 | AT>TA    | TS                  | CTC(A)AGG      | Lys>stop          | 1            |
| 208                                 | GC>CG    | TS                  | AAG(G)GGG      | Gly>Arg           | 1            |
| 271                                 | AT>TA    | TS                  | GAT(A)GAT      | Arg>stop          | 1            |
| 475                                 | AT>TA    | TS                  | GTT(A)AGG      | Lys>stop          | 1            |
| 486                                 | GC>TA    | NTS                 | AAG(C)TTG      | Ser>Arg           | 1            |
| 548                                 | AT>TA    | NTS                 | AAA(T)TCC      | Val>Asp           | 1            |
| 551                                 | GC>TA    | NTS                 | TTC(C)AGA      | Pro>Gln           | 1            |
| 606                                 | GC>TA    | TS                  | TTT(G)AAT      | Leu>Phe           | 1            |
| 623                                 | AT>TA    | NTS                 | TCA(T)TAG      | Ile>Asn           | 1            |
| 631                                 | AT>TA    | TS                  | GAA(A)CTG      | Thr>Ser           | 1            |
| 635                                 | GC>TA    | TS                  | CTG(G)AAA      | Gly>Val           | 1            |
| 640                                 | GC>TA    | TS                  | AAA(G)CCA      | Ala>Ser           | 2            |
| Tandem mutations                    |          |                     |                |                   |              |
| 118                                 | GC>AT    | TS                  | CAT(GG)ACT     | Gly>Lys           | 5            |
| 119                                 | GC>AT    | TS                  |                |                   |              |
| 207                                 | GC>AT    | TS                  | CAA(GG)GGG     | Gly>Arg           | 2            |
| 208                                 | GC>AT    | TS                  |                |                   |              |

<sup>1</sup>TS, transcribed DNA strand; NTS, non-transcribed DNA strand; NA, not applicable.

Table S1. Mutation spectra at genomic *Hprt* in ES cells (Continued)

| <i>Xpa</i> <sup>-/-</sup> ES cells (n = 127 substitutions, from in total two experiments), 0.75 J/m <sup>2</sup> UV-C |             |     |                |          |   |
|-----------------------------------------------------------------------------------------------------------------------|-------------|-----|----------------|----------|---|
| 208                                                                                                                   | GC>AT       | TS  | AAG(GG)GGG     | Gly>Lys  | 2 |
| 209                                                                                                                   | GC>AT       | TS  |                |          |   |
| 209                                                                                                                   | GC>AT       | TS  | AGG(GG)GGC     | Gly>Glu  | 1 |
| 210                                                                                                                   | GC>AT       | TS  |                |          |   |
| 211                                                                                                                   | GC>TA       | TS  | GGG(GG)CTA     | Gly>Tyr  | 1 |
| 212                                                                                                                   | GC>AT       | TS  |                |          |   |
| 418                                                                                                                   | GC>AT       | TS  | ACT(GG)TAA     | Gly>Asn  | 2 |
| 419                                                                                                                   | GC>AT       | TS  |                |          |   |
| 495                                                                                                                   | GC>TA       | TS  | GGT(GA)AAA     | Lys>stop | 1 |
| 496                                                                                                                   | AT>TA       | TS  |                |          |   |
| 499                                                                                                                   | AT>TA       | TS  | AAA(AG)GAC     | Arg>stop | 1 |
| 500                                                                                                                   | GC>AT       | TS  |                |          |   |
| 538                                                                                                                   | GC>AT       | TS  | GTT(GG)ATT     | Val>Lys  | 1 |
| 539                                                                                                                   | GC>AT       | TS  |                |          |   |
| 568                                                                                                                   | GC>AT       | TS  | GTT(GG)ATA     | Gly>Lys  | 2 |
| 569                                                                                                                   | GC>AT       | TS  |                |          |   |
| 600                                                                                                                   | GC>AT       | TS  | CAG(GG)ATT     | Asp>Asn  | 4 |
| 601                                                                                                                   | GC>AT       | TS  |                |          |   |
| 600                                                                                                                   | GC>CG       | TS  | CAG(GGA)TTT    | Asp>Ile  | 1 |
| 601                                                                                                                   | GC>AT       | TS  |                |          |   |
| 602                                                                                                                   | AT>TA       | TS  |                |          |   |
| Multiple independent mutations                                                                                        |             |     |                |          |   |
| 34                                                                                                                    | GC>TA<br>+C | TS  | AGC(G)(+C)ATG  |          | 1 |
| 113                                                                                                                   | GC>AT       | NTS | TTC(C)T(-C)ATG |          | 1 |
| 115                                                                                                                   | -C          |     |                |          |   |
| 202                                                                                                                   | GC>AT       | NTS | GTG(C)T(C)AAG  | Leu>Phe  | 2 |
| 204                                                                                                                   | GC>AT       | NTS |                |          |   |
| 380                                                                                                                   | GC>AT       | TS  | CTG(G)A(A)AGA  | Gly>Glu  | 1 |
| 382                                                                                                                   | AT>GC       | TS  |                | Lys>Glu  |   |
| 403                                                                                                                   | GC>AT       | TS  | GAA(G)A(T)ATA  | Asp>Lys  | 1 |
| 405                                                                                                                   | AT>TA       | NTS |                |          |   |
| 580                                                                                                                   | GC>AT       | TS  | CTT(G)A(C)TAT  | Asp>Lys  | 1 |
| 582                                                                                                                   | GC>TA       | NTS |                |          |   |
| 589                                                                                                                   | GC>TA       | TS  | AAT(G)A(G)TAC  | Glu>stop | 1 |
| 591                                                                                                                   | GC>AT       | TS  |                |          |   |
| Insertions                                                                                                            |             |     |                |          |   |
| 511                                                                                                                   | +T          |     | GAA(+T)GTG     |          | 1 |
| 625                                                                                                                   | +T          |     | TTA(+T)GTG     |          | 1 |
| Deletions                                                                                                             |             |     |                |          |   |
| 47                                                                                                                    | -G          |     | CAG(-G)TTA     |          | 1 |

<sup>1</sup>TS, transcribed DNA strand; NTS, non-transcribed DNA strand; NA, not applicable.

Table S1. Mutation spectra at genomic *Hprt* in ES cells (Continued)

| <i>Xpa</i> <sup>-/-</sup> ES cells (n = 127 substitutions, from in total two experiments), 0.75 J/m <sup>2</sup> UV-C                                 |          |        |                |                   |              |
|-------------------------------------------------------------------------------------------------------------------------------------------------------|----------|--------|----------------|-------------------|--------------|
| Transversions at non-dipyrimidine sites                                                                                                               |          |        |                |                   |              |
| 1                                                                                                                                                     | AT>TA    |        | (A)TGC         | Met>Leu           | 3            |
| 2                                                                                                                                                     | AT>GC    |        | A(T)GCC        | Met>Thr           | 1            |
| 84                                                                                                                                                    | AT>CG    |        | TTA(T)GCC      | Tyr>stop          | 1            |
| 397                                                                                                                                                   | GC>TA    |        | ATT(G)TTG      | Val>Phe           | 1            |
| Multiple independent mutations                                                                                                                        |          |        |                |                   |              |
| 199                                                                                                                                                   | GC>TA    |        | TGT(G)T(G)CTC  | Val>Phe           | 1            |
| 201                                                                                                                                                   | GC>TA    |        |                |                   |              |
| Insertions                                                                                                                                            |          |        |                |                   |              |
| 631                                                                                                                                                   | +T       |        | AAA(+T)CTG     |                   | 1            |
| Deletions                                                                                                                                             |          |        |                |                   |              |
| 533-553                                                                                                                                               | 21bp     |        |                |                   | 1            |
| <i>Msh6</i> <sup>-/-</sup> <i>Xpa</i> <sup>-/-</sup> ES cell line 4 (n = 141 substitutions, from in total two experiments) 0.75 J/m <sup>2</sup> UV-C |          |        |                |                   |              |
| position                                                                                                                                              | mutation | strand | 5' → 3' target | amino acid change | # of mutants |
| Transitions at dipyrimidine sites                                                                                                                     |          |        |                |                   |              |
| 40                                                                                                                                                    | GC>AT    | TS     | GAT(G)AAC      | Glu>Lys           | 1            |
| 113                                                                                                                                                   | GC>AT    | NTS    | TTC(C)TCA      | Pro>Leu           | 5            |
| 118                                                                                                                                                   | GC>AT    | TS     | CAT(G)GAC      | Gly>Arg           | 2            |
| 122                                                                                                                                                   | AT>GC    | NTS    | GAC(T)GAT      | Leu>Pro           | 1            |
| 139                                                                                                                                                   | GC>AT    | TS     | ACT(G)AAA      | Glu>Lys           | 3            |
| 149                                                                                                                                                   | GC>AT    | NTS    | TTG(C)TCG      | Ala>Val           | 1            |
| 196                                                                                                                                                   | AT>GC    | NTS    | CTC(T)GTG      | Cys>Arg           | 1            |
| 209                                                                                                                                                   | GC>AT    | TS     | AGG(G)GGG      | Gly>Glu           | 1            |
| 212                                                                                                                                                   | GC>AT    | TS     | GGG(G)CTA      | Gly>Asp           | 6            |
| 233                                                                                                                                                   | AT>GC    | NTS    | ACC(T)GCT      | Leu>Pro           | 1            |
| 254                                                                                                                                                   | AT>GC    | NTS    | CAC(T)GAA      | Leu>Pro           | 1            |
| 374                                                                                                                                                   | AT>GC    | NTS    | CTT(T)AAC      | Leu>Ser           | 1            |
| 400                                                                                                                                                   | GC>AT    | TS     | GTT(G)AAG      | Glu>Lys           | 9            |
| 403                                                                                                                                                   | GC>AT    | TS     | GAA(G)ATA      | Asp>Asn           | 1            |
| 418                                                                                                                                                   | GC>AT    | TS     | ACT(G)GTA      | Gly>Ser           | 2            |
| 508                                                                                                                                                   | GC>AT    | NTS    | TCT(C)GAA      | Arg>stop          | 1            |
| 526                                                                                                                                                   | GC>AT    | NTS    | AGG(C)CAG      | Pro>Ser           | 1            |
| 533                                                                                                                                                   | AT>GC    | NTS    | ACT(T)TGT      | Phe>Ser           | 1            |
| 538                                                                                                                                                   | GC>AT    | TS     | GTT(G)GAT      | Gly>Arg           | 1            |
| 539                                                                                                                                                   | GC>AT    | TS     | TTG(G)ATT      | Gly>Glu           | 4            |
| 541                                                                                                                                                   | AT>GC    | NTS    | GGA(T)TTG      | Phe>Leu           | 1            |
| 544                                                                                                                                                   | GC>AT    | TS     | TTT(G)AAA      | Glu>Lyss          | 7            |
| 550                                                                                                                                                   | GC>AT    | NTS    | ATT(C)CAG      | Pro>Ser           | 1            |
| 551                                                                                                                                                   | GC>AT    | NTS    | TTC(C)AGA      | Pro>Leu           | 2            |
| 568                                                                                                                                                   | GC>AT    | TS     | GTT(G)GAT      | Gly>Arg           | 1            |
| 580                                                                                                                                                   | GC>AT    | TS     | CTT(G)ACT      | Asp>Asn           | 1            |
| 589                                                                                                                                                   | GC>AT    | TS     | AAT(G)AGT      | Glu>lys           | 10           |
| 599                                                                                                                                                   | GC>AT    | TS     | TCA(G)GGA      | Arg>lys           | 5            |
| 601                                                                                                                                                   | GC>AT    | TS     | AGG(G)ATT      | Asp>Asn           | 2            |
| 605                                                                                                                                                   | AT>GC    | NTS    | ATT(T)GAA      | Leu>Ser           | 1            |
| 635                                                                                                                                                   | GC>AT    | TS     | CTG(G)AAA      | Gly>Glu           | 3            |
| 655                                                                                                                                                   | AT>GC    | NTS    | GCC(T)AAG      | stop>Gln          | 1            |
| Transversions at dipyrimidine sites                                                                                                                   |          |        |                |                   |              |

<sup>†</sup>TS, transcribed DNA strand; NTS, non-transcribed DNA strand; NA, not applicable.

Table S1. Mutation spectra at genomic *Hprt* in ES cells (Continued)

| <i>Xpa</i> <sup>-/-</sup> ES cells (n = 127 substitutions, from in total two experiments), 0.75 J/m <sup>2</sup> UV-C |       |          |            |          |   |  |
|-----------------------------------------------------------------------------------------------------------------------|-------|----------|------------|----------|---|--|
| 101                                                                                                                   | AT>TA | TS       | AAA(A)AGT  | Lys>Ile  | 1 |  |
| 118                                                                                                                   | GC>TA | TS       | CAT(G)GAC  | Gly>stop | 1 |  |
| 125                                                                                                                   | AT>CG | NTS      | TGA(T)TAT  | Ile>Ser  | 3 |  |
| 140                                                                                                                   | AT>TA | TS       | CTG(A)AAG  | Glu>Val  | 1 |  |
| 222                                                                                                                   | GC>TA | NTS      | GTT(C)TTT  | Phe>Leu  | 1 |  |
| 296                                                                                                                   | AT>CG | NTS      | ATT(T)TAT  | Phe>Cys  | 1 |  |
| 391                                                                                                                   | AT>TA | NTS      | GTC(T)TGA  | Leu>Met  | 1 |  |
| 395                                                                                                                   | AT>TA | NTS      | TGA(T)TGT  | Ile>Asn  | 1 |  |
| 498                                                                                                                   | AT>TA | TS       | GAA(A)AGG  | Lys>Asn  | 1 |  |
| 544                                                                                                                   | GC>TA | TS       | TTT(G)AAA  | Glu>stop | 1 |  |
| 548                                                                                                                   | AT>CG | NTS      | AAA(T)TCC  | Ile>Ser  | 1 |  |
| 581                                                                                                                   | AT>CG | TS       | TTG(A)CTA  | Asp>Ala  | 1 |  |
| 583                                                                                                                   | AT>TA | NTS      | GAC(T)ATA  | Tyr>Asn  | 2 |  |
| 594                                                                                                                   | GC>CG | NTS      | GTA(C)TTC  | Tyr>stop | 1 |  |
| 606                                                                                                                   | GC>TA | TS       | TTT(G)AAT  | Leu>Phe  | 1 |  |
| Tandem mutations                                                                                                      |       |          |            |          |   |  |
| 46                                                                                                                    | GC>AT | TS       | CCA(GG)TTA | Gly>Asn  | 2 |  |
| 47                                                                                                                    | GC>AT | TS       |            |          |   |  |
| 109                                                                                                                   | AT>GC | no dimer | TTT(AT)TCC | Ile>Gly  | 1 |  |
| 110                                                                                                                   | AT>CG | NTS      |            |          |   |  |
| 112                                                                                                                   | GC>AT | NTS      | ATT(CC)TCA | Pro>Phe  | 1 |  |
| 113                                                                                                                   | GC>AT | NTS      |            |          |   |  |
| 118                                                                                                                   | GC>AT | TS       | CAT(GG)ACT | Gly>Lys  | 3 |  |
| 119                                                                                                                   | GC>AT | TS       |            |          |   |  |
| 124                                                                                                                   | AT>TA | TS       | CTG(AT)TAT | Ile>Tyr  | 1 |  |
| 125                                                                                                                   | AT>TA | NTS      |            |          |   |  |
| 207                                                                                                                   | GC>AT | TS       | CAA(GG)GGG | Gly>Arg  | 1 |  |
| 208                                                                                                                   | GC>AT | TS       |            |          |   |  |
| 208                                                                                                                   | GC>AT | TS       | AAG(GG)GGG | Gly>Lys  | 3 |  |
| 209                                                                                                                   | GC>AT | TS       |            |          |   |  |
| 209                                                                                                                   | GC>AT | TS       | AGG(GG)GGC | Gly>Glu  | 4 |  |
| 210                                                                                                                   | GC>AT | TS       |            |          |   |  |
| 400                                                                                                                   | GC>AT | TS       | GTT(GA)AGA | Glu>Arg  | 1 |  |
| 401                                                                                                                   | AT>GC | TS       |            |          |   |  |
| 418                                                                                                                   | GC>AT | TS       | ACT(GG)TAA | Gly>Asn  | 2 |  |
| 419                                                                                                                   | GC>AT | TS       |            |          |   |  |
| 463                                                                                                                   | GC>TA | NTS      | AGC(CC)CAA | Pro>Ile  | 1 |  |
| 464                                                                                                                   | GC>AT | NTS      |            |          |   |  |
| 538                                                                                                                   | GC>AT | TS       | GTT(GG)ATT | Gly>Lys  | 2 |  |
| 539                                                                                                                   | GC>AT | TS       |            |          |   |  |
| 568                                                                                                                   | GC>AT | TS       | GTT(GG)ATA | Gly>Lys  | 2 |  |
| 569                                                                                                                   | GC>AT | TS       |            |          |   |  |
| 598                                                                                                                   | AT>GC | TS       | TTC(AG)GGA | Arg>Glu  | 1 |  |

<sup>1</sup>TS, transcribed DNA strand; NTS, non-transcribed DNA strand; NA, not applicable.



Table S1. Mutation spectra at genomic *Hprt* in ES cells (Continued)

| <i>Xpa</i> <sup>-/-</sup> ES cells (n = 127 substitutions, from in total two experiments), 0.75 J/m <sup>2</sup> UV-C                    |           |          |                |                   |             |  |
|------------------------------------------------------------------------------------------------------------------------------------------|-----------|----------|----------------|-------------------|-------------|--|
| 599                                                                                                                                      | GC>AT     | TS       |                |                   |             |  |
| 599                                                                                                                                      | GC>AT     | TS       | TCA(GG)GAT     | Arg>Lys           | 1           |  |
| 600                                                                                                                                      | GC>AT     | TS       |                |                   |             |  |
| 600                                                                                                                                      | GC>AT     | TS       | CAG(GG)ATT     | Asp>Asn           | 1           |  |
| 601                                                                                                                                      | GC>AT     | TS       |                |                   |             |  |
| Multiple Independent mutations                                                                                                           |           |          |                |                   |             |  |
| 69                                                                                                                                       | AT>TA     | no dimer | TTG(T)ATA      | Cys>stop          | 1           |  |
| 79                                                                                                                                       | GC>AT     | NTS      | AAT(C)ATT      | His>Tyr           |             |  |
| 103                                                                                                                                      | GC>TA     | TS       | AAA(G)TGT      | Val>Leu           | 1           |  |
| 112                                                                                                                                      | GC>AT     | NTS      | ATT(C)CTC      | Pro>Ser           |             |  |
| 179                                                                                                                                      | AT>TA     | no dimer | GCC(A)T(C)ACA  | His>Leu           | 1           |  |
| 181                                                                                                                                      | GC>AT     | NTS      | GCC(A)T(C)ACA  | His>Tyr           |             |  |
| 209                                                                                                                                      | insertion |          | GGG(+A)GGG     |                   | 1           |  |
| 213                                                                                                                                      | GC>AT     | NTS      | GGG(C)T(A)TAA  |                   |             |  |
| 215                                                                                                                                      | AT>TA     | no dimer | GGG(C)T(A)TAA  |                   |             |  |
| 400                                                                                                                                      | GC>AT     | TS       | GTT(G)A(A)GAT  | Glu>Lys           | 1           |  |
| 402                                                                                                                                      | AT>GC     | TS       | GTT(G)A(A)GAT  |                   |             |  |
| 471                                                                                                                                      | GC>AT     | TS       | AAT(G)GTT      | Met>Ile           | 1           |  |
| 482                                                                                                                                      | GC>CG     | no dimer | TTG(C)AAG      | Ala>Gly           |             |  |
| 553                                                                                                                                      | insertion |          | CCA(+T)GAC     |                   | 1           |  |
| 554                                                                                                                                      | AT>CG     | TS       | CAG(AC)AAG     |                   |             |  |
| 555                                                                                                                                      | GC>TA     | no dimer | CAG(AC)AAG     |                   |             |  |
| 558                                                                                                                                      | GC>TA     | TS       | CAA(G)TTT      |                   |             |  |
| Insertions                                                                                                                               |           |          |                |                   |             |  |
| 207-212                                                                                                                                  | +G        | TS       | GGGGGG         |                   | 1           |  |
| Transitions at non-dipyrimidine sites                                                                                                    |           |          |                |                   |             |  |
| 3                                                                                                                                        | GC>AT     |          | AT(G)CCG       | Met>Ile           | 1           |  |
| 197                                                                                                                                      | GC>AT     |          | TCT(G)TGT      | Cys>Tyr           | 1           |  |
| 521                                                                                                                                      | AT>GC     |          | GAT(A)CAG      | Tyr>stop          | 1           |  |
| Transversions at non-dipyrimidine sites                                                                                                  |           |          |                |                   |             |  |
| 109                                                                                                                                      | AT>TA     |          | TTT(A)TTC      | Ile>Phe           | 2           |  |
| 197                                                                                                                                      | GC>CG     |          | TCT(G)TGT      | Cys>Tyr           | 1           |  |
| 572                                                                                                                                      | AT>CG     |          | GAT(A)TGC      | Tyr>Ser           | 1           |  |
| Tandem mutations                                                                                                                         |           |          |                |                   |             |  |
| 571                                                                                                                                      | AT>TA     |          | GGA(TA)TGC     | Tyr>Ser           | 1           |  |
| 572                                                                                                                                      | AT>GC     |          |                |                   |             |  |
| Spontaneous substitutions in <i>Msh6</i> <sup>-/-</sup> <i>Xpa</i> <sup>-/-</sup> ES cell line 4, from in total two experiments (n = 30) |           |          |                |                   |             |  |
| position                                                                                                                                 | mutation  | strand   | 5' → 3' target | amino acid change | #of mutants |  |
| Transitions at dipyrimidines sites                                                                                                       |           |          |                |                   |             |  |
| 149                                                                                                                                      | GC>AT     | NA       | TTG(C)TCG      | Ala>Val           | 3           |  |
| 212                                                                                                                                      | GC>AT     | NA       | GGG(G)CTA      | Gly>Asp           | 12          |  |
| 233                                                                                                                                      | AT>GC     | NA       | ACC(T)GCT      | Leu>Pro           | 1           |  |

<sup>1</sup>TS, transcribed DNA strand; NTS, non-transcribed DNA strand; NA, not applicable.

Table S1. Mutation spectra at genomic *Hprt* in ES cells (Continued)

| <i>Xpa</i> <sup>-/-</sup> ES cells (n = 127 substitutions, from in total two experiments), 0.75 J/m <sup>2</sup> UV-C |       |    |           |         |   |
|-----------------------------------------------------------------------------------------------------------------------|-------|----|-----------|---------|---|
| 440                                                                                                                   | AT>GC | NA | TGC(T)TTC | Leu>Pro | 1 |
| 491                                                                                                                   | AT>GC | NA | TGC(T)GGT | Leu>Pro | 1 |
| 526                                                                                                                   | GC>AT | NA | AGG(C)CAG | Pro>Ser | 1 |
| 563                                                                                                                   | AT>GC | NA | TTG(T)TGT | Val>Ala | 1 |
| 589                                                                                                                   | GC>AT | NA | AAT(G)AGT | Glu>Lys | 3 |
| Transversions at dipyrimidines sites                                                                                  |       |    |           |         |   |
| 125                                                                                                                   | AT>CG | NA | TGA(T)TAT | Ile>Ser | 1 |
| 223                                                                                                                   | AT>CG | NA | TTC(T)TTG | Phe>Val | 2 |
| 293                                                                                                                   | AT>TA | NA | TAG(A)TTT | Asp>Val | 1 |
| Transitions at non-dipyrimidine sites                                                                                 |       |    |           |         |   |
| 148                                                                                                                   | GC>AT | NA | CTT(G)CTC | Ala>Thr | 1 |
| 617                                                                                                                   | GC>AT | NA | TTT(G)TGT | Cys>Tyr | 2 |

<sup>1</sup>TS, transcribed DNA strand; NTS, non-transcribed DNA strand; NA, not applicable.

Table S2. Mutations induced at a site-specific (6-4)TT embedded within a replicating plasmid.

|                           |   |          | <i>Xpc</i> (line 1, exp. 1) |       | <i>Xpc</i> (line 2, exp. 2) |       | <i>Msh2Xpc</i> (exp.1) |       | <i>Msh2Xpc</i> (exp. 2) |        |
|---------------------------|---|----------|-----------------------------|-------|-----------------------------|-------|------------------------|-------|-------------------------|--------|
| TLS events                |   |          | 87                          | 98.9% | 93                          | 98.9% | 88                     | 100%  | 89                      | 100.0% |
| Correct TLS               |   |          |                             |       |                             |       |                        |       |                         |        |
| 5'-TT                     | → | 5'-TT    | 36                          | 40.9% | 45                          | 47.9% | 46                     | 52.3% | 42                      | 47.2%  |
| Mutagenic TLS             |   |          | 50                          | 56.8% | 46                          | 48.9% | 40                     | 45.5% | 39                      | 43.8%  |
| 5'-TT                     | → | 5'-TA    | 0                           | 0.0%  | 5                           | 5.3%  | 5                      | 5.7%  | 15                      | 16.9%  |
| 5'-TT                     | → | 5'-TC    | 4                           | 4.5%  | 2                           | 2.1%  | 5                      | 5.7%  | 4                       | 4.5%   |
| 5'-TT                     | → | 5'-TG    | 0                           | 0.0%  | 0                           | 0.0%  | 1                      | 1.1%  | 1                       | 1.1%   |
| 5'-TT                     | → | 5'-AT    | 0                           | 0.0%  | 4                           | 4.3%  | 1                      | 1.1%  | 2                       | 2.2%   |
| 5'-TT                     | → | 5'-CT    | 0                           | 0.0%  | 0                           | 0.0%  | 0                      | 0.0%  | 1                       | 1.1%   |
| 5'-TT                     | → | 5'-GT    | 0                           | 0.0%  | 0                           | 0.0%  | 0                      | 0.0%  | 0                       | 0.0%   |
| 5'-TT                     | → | 5'-AA    | 0                           | 0.0%  | 0                           | 0.0%  | 1                      | 1.1%  | 0                       | 0.0%   |
| 5'-TT                     | → | 5'-AC    | 0                           | 0.0%  | 0                           | 0.0%  | 0                      | 0.0%  | 0                       | 0.0%   |
| 5'-TT                     | → | 5'-CA    | 0                           | 0.0%  | 0                           | 0.0%  | 0                      | 0.0%  | 0                       | 0.0%   |
| 5'-TT                     | → | 5'-CC    | 0                           | 0.0%  | 0                           | 0.0%  | 0                      | 0.0%  | 0                       | 0.0%   |
| 5'-TT                     | → | 5'-GC    | 0                           | 0.0%  | 0                           | 0.0%  | 0                      | 0.0%  | 0                       | 0.0%   |
| 5'-CTT                    | → | 5'-TTT   | 43                          | 48.9% | 29                          | 30.9% | 21                     | 23.9% | 10                      | 11.2%  |
| 5'-CTT                    | → | 5'-ATT   | 1                           | 1.1%  | 1                           | 1.1%  | 1                      | 1.1%  | 1                       | 1.1%   |
| 5'-CTT                    | → | 5'-GTT   | 0                           | 0.0%  | 0                           | 0.0%  | 0                      | 0.0%  | 0                       | 0.0%   |
| 5'-CTT                    | → | 5'-TAT   | 0                           | 0.0%  | 0                           | 0.0%  | 0                      | 0.0%  | 0                       | 0.0%   |
| 5'-CTT                    | → | 5'-TTA   | 2                           | 2.3%  | 3                           | 3.2%  | 3                      | 3.4%  | 2                       | 2.2%   |
| 5'-CTT                    | → | 5'-TTC   | 0                           | 0.0%  | 2                           | 2.1%  | 0                      | 0.0%  | 0                       | 0.0%   |
| 5'-CTT                    | → | 5'-TTG   | 0                           | 0.0%  | 0                           | 0.0%  | 0                      | 0.0%  | 1                       | 1.1%   |
| 5'-CTT                    | → | 5'-TAA   | 0                           | 0.0%  | 0                           | 0.0%  | 0                      | 0.0%  | 0                       | 0.0%   |
| 5'-CTT                    | → | 5'-AAT   | 0                           | 0.0%  | 0                           | 0.0%  | 0                      | 0.0%  | 0                       | 0.0%   |
| 5'-CTT                    | → | 5'-AAA   | 0                           | 0.0%  | 0                           | 0.0%  | 0                      | 0.0%  | 0                       | 0.0%   |
| 5'-CTT                    | → | 5'-ATA   | 0                           | 0.0%  | 0                           | 0.0%  | 0                      | 0.0%  | 1                       | 1.1%   |
| 5'-CTT                    | → | 5'-ATC   | 0                           | 0.0%  | 0                           | 0.0%  | 0                      | 0.0%  | 0                       | 0.0%   |
| 5'-TCTT                   | → | 5'-ACTT  | 0                           | 0.0%  | 0                           | 0.0%  | 1                      | 1.1%  | 0                       | 0.0%   |
| 5'-TCTT                   | → | 5'-ACTA  | 0                           | 0.0%  | 0                           | 0.0%  | 0                      | 0.0%  | 0                       | 0.0%   |
| 5'-TCTT                   | → | 5'-ATTT  | 0                           | 0.0%  | 0                           | 0.0%  | 1                      | 1.1%  | 1                       | 1.1%   |
| 5'-TCTT                   | → | 5'-ATAT  | 0                           | 0.0%  | 0                           | 0.0%  | 0                      | 0.0%  | 0                       | 0.0%   |
| 5'-TCTT                   | → | 5'-AAAC  | 0                           | 0.0%  | 0                           | 0.0%  | 0                      | 0.0%  | 0                       | 0.0%   |
| 5'-TCTT                   | → | 5'-ATTA  | 0                           | 0.0%  | 0                           | 0.0%  | 0                      | 0.0%  | 0                       | 0.0%   |
| 5'-TCTT                   | → | 5'-CTTA  | 0                           | 0.0%  | 0                           | 0.0%  | 0                      | 0.0%  | 0                       | 0.0%   |
| 5'-ATCTT                  | → | 5'-TTCTT | 0                           | 0.0%  | 0                           | 0.0%  | 0                      | 0.0%  | 0                       | 0.0%   |
| deletion                  |   |          | 1                           | 1.1%  | 2                           | 2.1%  | 2                      | 2.3%  | 8                       | 9.0%   |
| 5'-TT                     | → | 5'-A     | 0                           | 0.0%  | 0                           | 0.0%  | 0                      | 0.0%  | 0                       | 0.0%   |
| 5'-TT                     | → | 5'-C     | 0                           | 0.0%  | 0                           | 0.0%  | 0                      | 0.0%  | 0                       | 0.0%   |
| 5'-CTT                    | → | 5'-TT    | 1                           | 1.1%  | 1                           | 1.1%  | 1                      | 1.1%  | 1                       | 1.1%   |
| 5'-CTT                    | → | 5'-TA    | 0                           | 0.0%  | 0                           | 0.0%  | 0                      | 0.0%  | 0                       | 0.0%   |
| 5'-TTC                    | → | 5'-TT    | 0                           | 0.0%  | 0                           | 0.0%  | 0                      | 0.0%  | 0                       | 0.0%   |
| 5'-TCTT                   | → | 5'-CTT   | 0                           | 0.0%  | 0                           | 0.0%  | 0                      | 0.0%  | 0                       | 0.0%   |
| 5'-ATCTT                  | → | 5'-TCTT  | 0                           | 0.0%  | 0                           | 0.0%  | 0                      | 0.0%  | 0                       | 0.0%   |
| 5'-CTTC                   | → | 5'-CC    | 0                           | 0.0%  | 1                           | 1.1%  | 0                      | 0.0%  | 4                       | 4.5%   |
| 5'-CTTC                   | → | 5'-C     | 0                           | 0.0%  | 0                           | 0.0%  | 1                      | 1.1%  | 1                       | 1.1%   |
| 5'-CTTCA                  | → | 5'-CC    | 0                           | 0.0%  | 0                           | 0.0%  | 0                      | 0.0%  | 0                       | 0.0%   |
| 5'-CTTCA                  | → | 5'-C     | 0                           | 0.0%  | 0                           | 0.0%  | 0                      | 0.0%  | 0                       | 0.0%   |
| 5'-TCTTC                  | → | 5'-T     | 0                           | 0.0%  | 0                           | 0.0%  | 0                      | 0.0%  | 1                       | 1.1%   |
| 5'-TCTTC                  | → | 5'-C     | 0                           | 0.0%  | 0                           | 0.0%  | 0                      | 0.0%  | 1                       | 1.1%   |
| insertion                 |   |          | 0                           | 0.0%  | 0                           | 0.0%  | 0                      | 0.0%  | 0                       | 0.0%   |
| large deletion /insertion |   | 1        | 1                           | 1.1%  | 1                           | 1.1%  | 0                      | 0.0%  | 0                       | 0.0%   |
| sum                       |   |          | 88                          | 100%  | 94                          | 100%  | 88                     | 100%  | 89                      | 100%   |
